# Supplementary material
Source: PubMed Central journal article supplement (PMC7495454)
Supplement: ao0c02133_si_001.pdf [file ao0c02133_si_001.pdf]

## **Supporting Information**

### **Investigating the Applicability of Molecular Dynamics Simulation for Estimating the Wettability of Sandstone Hydrocarbon Formations**

Vahid Khosravi\*, Syed Mohammad Mahmood\*\*, Davood Zivar, Hamid Sharifigaliuk

Petroleum Engineering Department, Universiti Teknologi PETRONAS, Perak, Malaysia

\*Corresponding author email: vahid.khosravi87@gmail.com, vahid\_17006746@utp.edu.my

\*\*Corresponding author email: Mohammad.mahmood@utp.edu.my

Table S1. Trajectory documents of the different scenarios

| Liquid          | Number of fluid atoms | Number of total atoms of the system (fluids and polyethylene surface) | Size of Surface (polyethylene) (A*B*C each in Å) as amorphous cell | Amorphous Cell Volume (Å <sup>3</sup> ) |
|-----------------|-----------------------|-----------------------------------------------------------------------|--------------------------------------------------------------------|-----------------------------------------|
| n-pentane       | 17                    | 637                                                                   | 19.7353*19.7353*19.7353                                            | 7686.52                                 |
| n-hexane        | 20                    | 640                                                                   | 19.4709*19.4709*19.4709                                            | 7381.76                                 |
| n-heptane       | 23                    | 643                                                                   | 19.2225*19.2225*19.2225                                            | 7102.84                                 |
| n-octane        | 26                    | 646                                                                   | 19.0782*19.0782*19.0782                                            | 6944.01                                 |
| n-decane        | 32                    | 652                                                                   | 18.8997*18.8997*18.8997                                            | 6750.99                                 |
| cyclohexane     | 18                    | 638                                                                   | 18.3733*18.3733*18.3733                                            | 6202.45                                 |
| n-tetradecane   | 44                    | 664                                                                   | 18.7317*18.7317*18.7317                                            | 6572.50                                 |
| toluene         | 15                    | 635                                                                   | 17.7456*17.7456*17.7456                                            | 5588.18                                 |
| benzyl alcohol  | 16                    | 636                                                                   | 16.7318*16.7318*16.7318                                            | 4684.16                                 |
| ethylene glycol | 10                    | 630                                                                   | 16.2863*16.2863*16.2863                                            | 4319.84                                 |

### Dynamics Energies

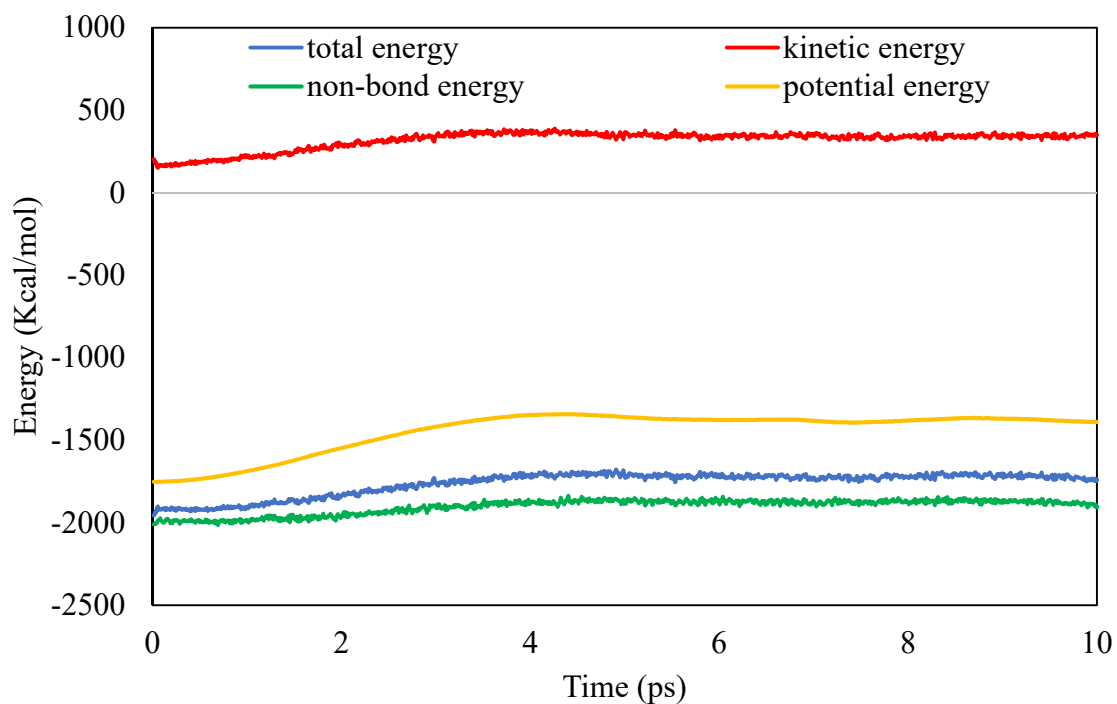

Figure S1. The dynamic energy of the system

Table S2. The molarity amounts of each concentration

| NaCl brine concentration (ppm) | Molarity (mol/liter) |
|--------------------------------|----------------------|
| 1,000                          | 0.017                |
| 3,000                          | 0.051                |
| 5,000                          | 0.085                |
| 10,000                         | 0.171                |
| 15,000                         | 0.256                |
